# Supplementary material for: Antibody development and disease severity of COVID-19 in non-immunised patients with rheumatic immune-mediated inflammatory diseases: data from a prospective cohort study
Source: HighWire-hosted journal article supplement (doi:10.1136/rmdopen-2021-002035), 2022-04-01
Supplement: rmdopen-2021-002035supp001_data_supplement.pdf [file rmdopen-2021-002035supp001_data_supplement.pdf]

## Antibody development and disease severity of COVID-19 in non-immunized patients with rheumatic immune-mediated inflammatory diseases: data from a prospective cohort study

L. Boekel, F. Hooijberg, E.H. Vogelzang, Y.R. Besten, M. Leeuw, S. Atiqi, R. van Vollenhoven, C. A. Wijbrandts, M. Gerritsen, C. Krieckaert, B. Dijkshoorn, S. Bakhlakh, J.J. Crooijmans, A.E. Voskuyl, I.E. van der Horst-Bruinsma, W.F. Lems, T.W. Kuijpers, S.M. van Ham, L. Wieske<sup>§</sup>, F. Eftimov, L. Y. Kummer, P.J. van Dam, E.W. Stalman, M. Steenhuis, S. Keijzer, O. Cristianawati, J. Keijser, F. Loeff, S.W. Tas, M.T. Nurmohamed, M. Boers, T. Rispens, G.J. Wolbink

### Appendix

**Table S1. The development of rheumatic disease activity over time in patients with rheumatoid arthritis and ankylosing spondylitis.**

|                         | RAPID-3 score in patients with rheumatoid arthritis |      |       | BASDAI score in patients with ankylosing spondylitis |     |       |
|-------------------------|-----------------------------------------------------|------|-------|------------------------------------------------------|-----|-------|
| April – July, 2020      | n = 1073                                            | 9.7  | (6.0) | n = 624                                              | 3.7 | (2.0) |
| August – December, 2020 | n = 1016                                            | 9.4  | (6.0) | n = 593                                              | 3.6 | (2.0) |
| January – March, 2021   | n = 1115                                            | 11.4 | (5.6) | n = 658                                              | 4.3 | (1.9) |

Data are number of responses in each time-window (n), and mean (SD). RAPID-3 = routine assessment of patient index data 3, BASDAI = bath ankylosing spondylitis disease activity index

**Table S2. Logistic and linear mixed model analyses comparing seropositivity rates and IgG antibody titres of different treatment groups.**

|                               | Seropositivity |                |         | IgG antibody titer |       |                |         |
|-------------------------------|----------------|----------------|---------|--------------------|-------|----------------|---------|
|                               | OR             | 95% CI         | P value | Beta               | Ratio | 95% CI         | P value |
| No treatment with csDMARDs*   | 1.00           | N.A.           |         | 0.00               | 1.00  | N.A.           |         |
| Treatment with any csDMARD    | 0.99           | (0.44 – 2.45)  | 0.99    | 0.24               | 1.27  | (0.66 – 2.42)  | 0.47    |
| Methotrexate                  | 0.98           | (0.43 – 2.24)  | 0.96    | 0.38               | 1.47  | (0.74 – 2.90)  | 0.27    |
| No treatment with bDMARD*     |                |                |         | 0.00               | 1.00  | N.A.           |         |
| Treatment with any bDMARD     | 0.38           | (0.18 – 0.82)  | 0.014   | -0.38              | 0.68  | (0.36 – 1.28)  | 0.23    |
| TNF inhibitor                 | 0.48           | (0.21 – 0.11)  | 0.085   | -0.57              | 0.56  | (0.29 – 1.11)  | 0.098   |
| B-cell targeting therapy      | 0.10           | (0.010 – 1.08) | 0.058   | -0.21              | 0.81  | (0.043 – 15.3) | 0.89    |
| No treatment with prednisone* |                |                |         | 0.00               | 1.00  | N.A.           |         |
| Prednisone                    | 0.58           | (0.21 – 1.60)  | 0.29    | -1.02              | 0.36  | (0.040 – 3.22) | 0.33    |

Seropositivity data are adjusted odds ratios with 95% CI's in parentheses, and p values. IgG antibody titer data are adjusted  $\beta$ 's, back-transformed betas (ratios) with corresponding 95% CI's in parentheses, and p-values. All odds ratios and  $\beta$ 's are adjusted for age, sex, COVID-19 related hospitalization, time since COVID-19 disease onset and concomitant treatment with other immunosuppressive drugs. csDMARDs = conventional synthetic disease modifying anti-rheumatic drugs, TNF = tumor necrosis factor. \*Reference group. † Below the Benjamini threshold.

| <b>Table S3. Development of SARS-CoV-2 antibodies over time stratified for treatment groups.</b> |                        |                        |
|--------------------------------------------------------------------------------------------------|------------------------|------------------------|
|                                                                                                  | No. seroconversion (%) | Median IgG titer (IQR) |
| <b>&lt; 3 months after disease onset of COVID-19</b>                                             |                        |                        |
| Healthy controls                                                                                 | 27/33 (82)             | 12.9 (8.0 – 41.1)      |
| All Patients                                                                                     | 76/84 (91)             | 24.1 (9.5 – 71.3)      |
| No immunosuppressive therapy                                                                     | 21/23 (91)             | 17.9 (9.8 – 40.9)      |
| Treatment with any csDMARD                                                                       | 43/49 (88)             | 27.6 (7.4 – 91.6)      |
| Methotrexate                                                                                     | 33/38 (87)             | 24.2 (5.4 – 88.3)      |
| Treatment with any biological                                                                    | 24/28 (86)             | 24.2 (5.4 – 68.9)      |
| TNF-inhibitor                                                                                    | 20/24 (83)             | 44.9 (5.4 – 43.8)      |
| B-cell inhibitor                                                                                 | 1/1 (100)              | 300 N.A.               |
| Prednisone                                                                                       | 7/8 (88)               | 18.0 (2.7 – 107.0)     |
| <b>3 – 6 months after disease onset of COVID-19</b>                                              |                        |                        |
| Healthy controls                                                                                 | 22/25 (88)             | 8.9 (3.1 – 24.6)       |
| All Patients                                                                                     | 70/83 (84)             | 18.4 (5.1 – 44.5)      |
| No immunosuppressive therapy                                                                     | 15/19 (79)             | 20.4 (11.6 – 46.3)     |
| Treatment with any csDMARD                                                                       | 36/39 (92)             | 21.3 (5.0 – 52.1)      |
| Methotrexate                                                                                     | 28/31 (90)             | 25.8 (5.1 – 70.1)      |
| Treatment with any biological                                                                    | 25/34 (73)             | 10.3 (4.3 – 41.4)      |
| TNF-inhibitor                                                                                    | 22/28 (78)             | 11.3 (4.3 – 39.9)      |
| B-cell inhibitor                                                                                 | 2/2 (100)              | 120.6 -                |
| Prednisone                                                                                       | 7/11 (64)              | 67.4 (22.0 – 183.5)    |
| <b>&gt;6 months after disease onset of COVID-19</b>                                              |                        |                        |
| Healthy controls                                                                                 | 52/60 (87)             | 7.1 (1.6 – 12.4)       |
| All Patients                                                                                     | 120/156 (77)           | 8.2 (1.9 – 16.9)       |
| No immunosuppressive therapy                                                                     | 25/28 (90)             | 6.6 (3.7 – 13.6)       |
| Treatment with any csDMARD                                                                       | 62/87 (71)             | 8.5 (2.1 – 17.5)       |
| Methotrexate                                                                                     | 50/70 (71)             | 8.3 (1.8 – 17.5)       |
| Treatment with any biological                                                                    | 50/72 (69)             | 13.3 (0.4 – 14.4)      |
| TNF-inhibitor                                                                                    | 41/55 (75)             | 1.8 (0.3 – 9.3)        |
| B-cell inhibitor*                                                                                | 2/7 (29)               | -                      |
| Prednisone                                                                                       | 15/22 (68)             | 6.4 (0.2 – 24.1)       |

Data are mean (SD), median (IQR), or n (%). Patients could contribute to data on multiple time-points. Quantification of IgG titers could not be performed in 14 (4%) of 367 samples due to a shortage of serum volume.

| <b>Table S4. Treatment alternations during follow-up in IMID patients receiving immunosuppressive agents.</b> |                              |
|---------------------------------------------------------------------------------------------------------------|------------------------------|
|                                                                                                               | <b>Patients<br/>N = 2728</b> |
| Treatment alteration during follow-up (yes) – no. (%)                                                         | 848 (30)                     |
| <b>Reason of change – no. (%)</b>                                                                             | <b>N = 815</b>               |
| COVID-19 infection                                                                                            | 53 (7)                       |
| Other infection                                                                                               | 58 (7)                       |
| Adverse events                                                                                                | 252 (31)                     |
| Failure                                                                                                       | 252 (31)                     |
| Other                                                                                                         | 376 (46)                     |
| <b>Type of change – no. (%)</b>                                                                               | <b>N = 695</b>               |
| Temporary discontinuation                                                                                     | 176                          |
| Dose adjustment                                                                                               | 342                          |
| Switch to alternative therapy (permanent)                                                                     | 156                          |
| Initiation of additional drug                                                                                 | 73                           |
| Other                                                                                                         | 43                           |

Data are n (%). IMID = immune-mediated inflammatory disease. Change in medication use since baseline was evaluated; 2728 of 3080 patients completed a follow-up questionnaire in which this information was assessed. Type of change was only assessed in questionnaires distributed since January, 2021. Patients could alter their medication more than once during follow-up, and therefore contribute to multiple types and reasons of change.
